# Supplementary material
Source: publisher site journal article supplement (https://www.dovepress.com/article/350556)
Supplement: Supplementary file 1 [file get_supplementary_file.php]

**Supplementary figure S1. Outline of HIFU treatment lines, exposure parameters, and the expected consequential lifting effects (arrows).**


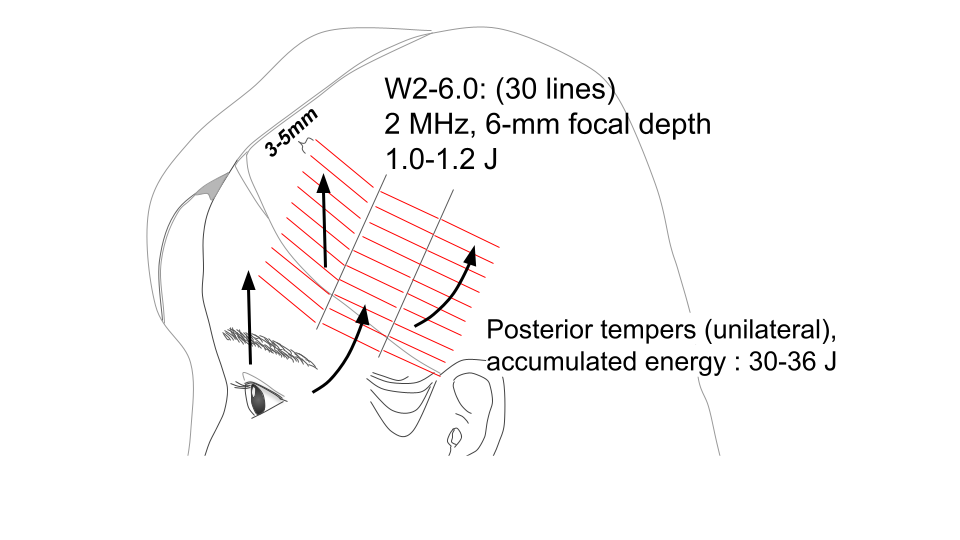

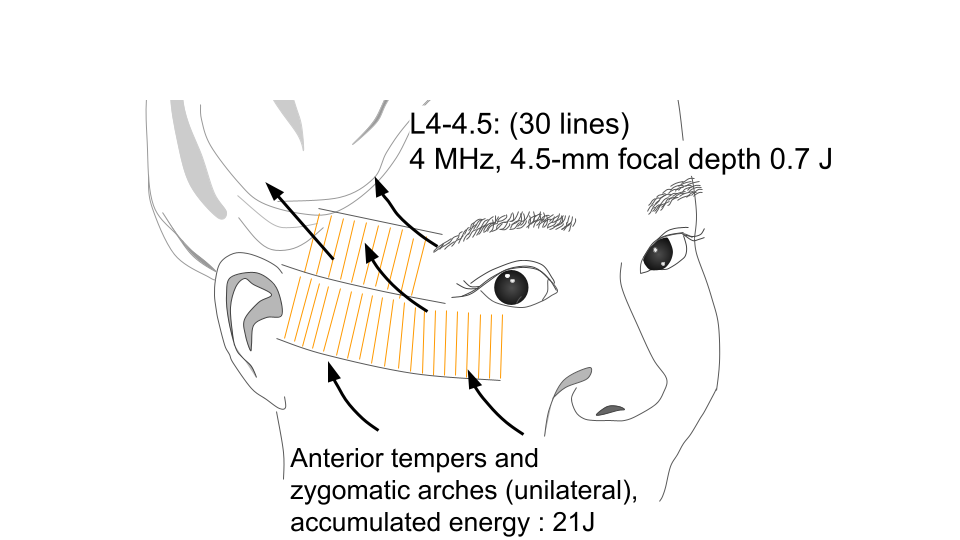


**
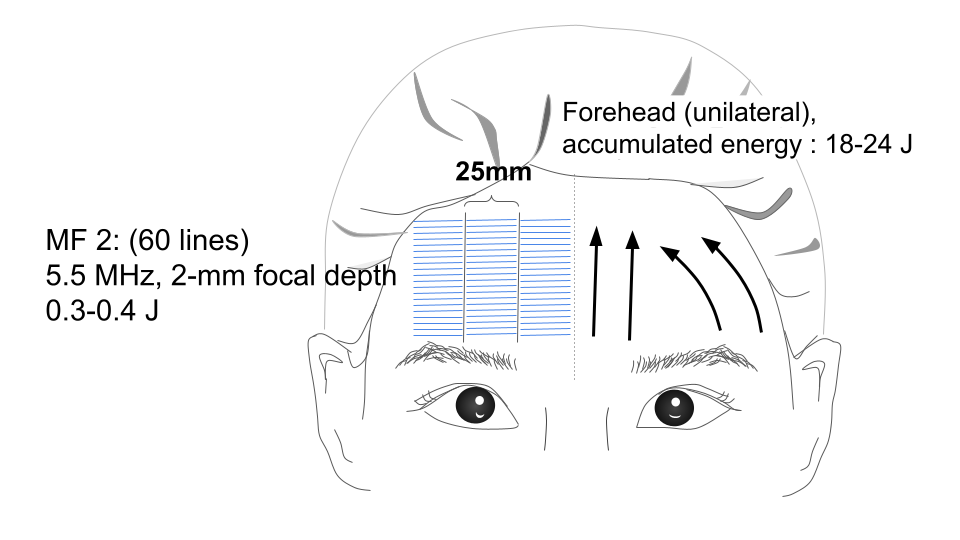
**

**The procedure was repeated on the collateral side. The total treatment included 240 exposure lines, and each session lasted 15–20 min. The total accumulated facial energy was 138–162 J. MHz: megahertz, J: joule, mm: millimeter.**

**Supplementary figure S2. Results of the angular assessment presented in a boxplot.**

| 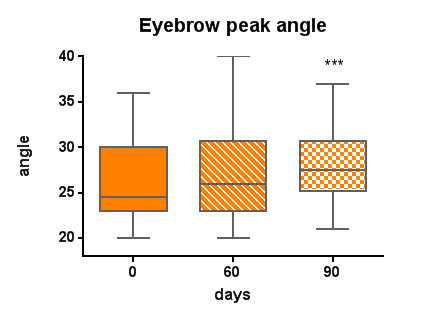 | 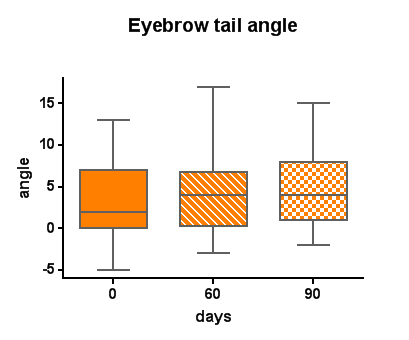 |
| --- | --- |
| 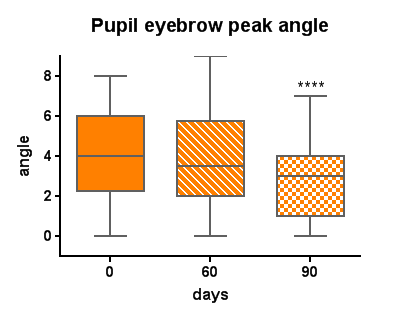 | 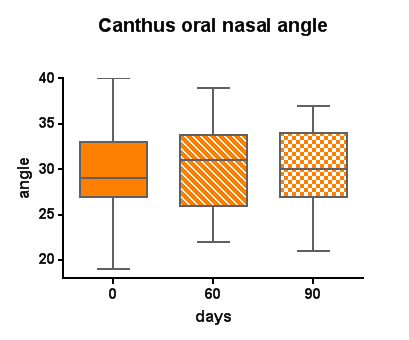 |

**X-axis: days of treatment; Y-axis: angle. *** means p< 0.001 and **** means p <0.0001.**

**Supplementary figure S3. Results of the linear assessment presented in a boxplot.**

| 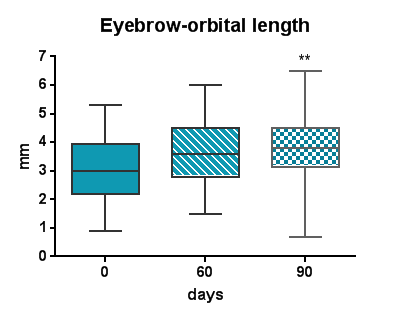  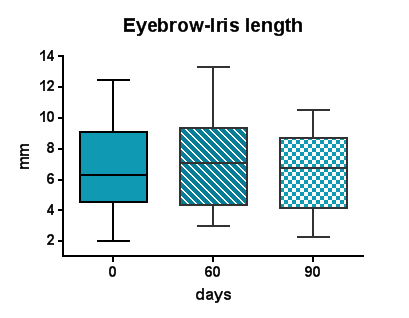 | **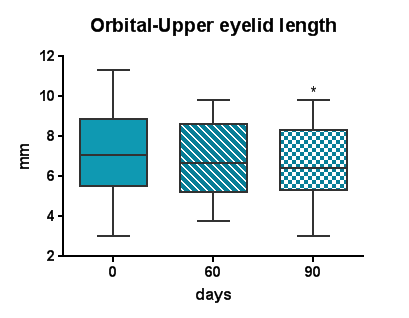**  **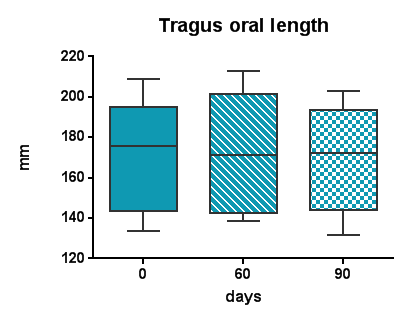** | 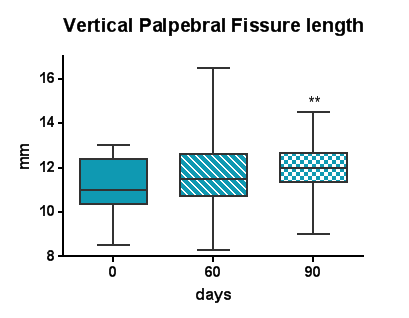 |
| --- | --- | --- |

**X-axis: days of treatment; Y-axis: mm, millimeter. * means p <0.05 and ** means p <0.01.**

**Supplementary table S1.Thirteen designed facial landmarks.**

| **Landmarks** | **Definitions** |
| --- | --- |
| Ei | inferior border of eyebrow |
| Os | superior orbital rim |
| Ps | superior palpebral fissure |
| Pi | inferior palpebral fissure |
| Il | lateral limbus of iris |
| Eh | eyebrow head |
| Ep | eyebrow peak |
| Et | eyebrow tail |
| Pu | center of pupil |
| Na | lateral end of nasal ala |
| Cl | lateral canthus |
| Oc | Oral commissure |
| Tr | Tragus |
